# Supplementary material for: Visual projection neurons in the Drosophila lobula link feature detection to distinct behavioral programs
Source: eLife journal article supplement (doi:10.7554/elife.21022), 2016-12-28
Supplement: supp [file elife-21022-supp-v1.zip]

Archive with 27 entries (27 files):
- elife_poa_e21022_Figure_11_figure_supplement_1.pdf
- elife_poa_e21022_Video_6.mp4
- elife_poa_e21022_Figure_9_figure_supplement_2.pdf
- elife_poa_e21022_Supplementary_Files_1A_1D.docx
- elife_poa_e21022_Figure_7_figure_supplement_2.pdf
- elife_poa_e21022_Figure_1_figure_supplement_1.pdf
- elife_poa_e21022_Figure_8_figure_supplement_1.pdf
- elife_poa_e21022_Figure_10_figure_supplement_2.pdf
- elife_poa_e21022_Figure_2_figure_supplement_1.pdf
- elife_poa_e21022_Figure_5_figure_supplement_2.pdf
- elife_poa_e21022_Figure_10_figure_supplement_1.pdf
- elife_poa_e21022_Figure_7_figure_supplement_1.pdf
- elife_poa_e21022_Video_4.avi
- elife_poa_e21022_Figure_8_figure_supplement_2.pdf
- elife_poa_e21022_Figure_9_figure_supplement_1.pdf
- elife_poa_e21022_Video_2.avi
- elife_poa_e21022_Figure_5_figure_supplement_1.pdf
- elife_poa_e21022_Video_5.avi
- elife_poa_e21022_Video_1.avi
- elife_poa_e21022_Video_7.avi
- elife_poa_e21022_Video_3.avi
- elife_poa_e21022_Figure_3_figure_supplement_1.pdf
- elife_poa_e21022_Figure_6_figure_supplement_1.pdf
- elife_poa_e21022_Figure_12_figure_supplement_1.pdf
- elife_poa_e21022_Figure_4_figure_supplement_1.pdf
- elife_poa_e21022_Figure_13_figure_supplement_1.pdf
- elife_poa_e21022_Figure_3_figure_supplement_2.pdf
