# Supplementary material for: Visual projection neurons in the Drosophila lobula link feature detection to distinct behavioral programs
Source: eLife journal article supplement (doi:10.7554/elife.21022), 2016-12-28
Supplement: supp [file elife-21022-supp-v1.zip › elife_poa_e21022_Figure_10_figure_supplement_2.pdf]

Figure 10 – figure supplement 2

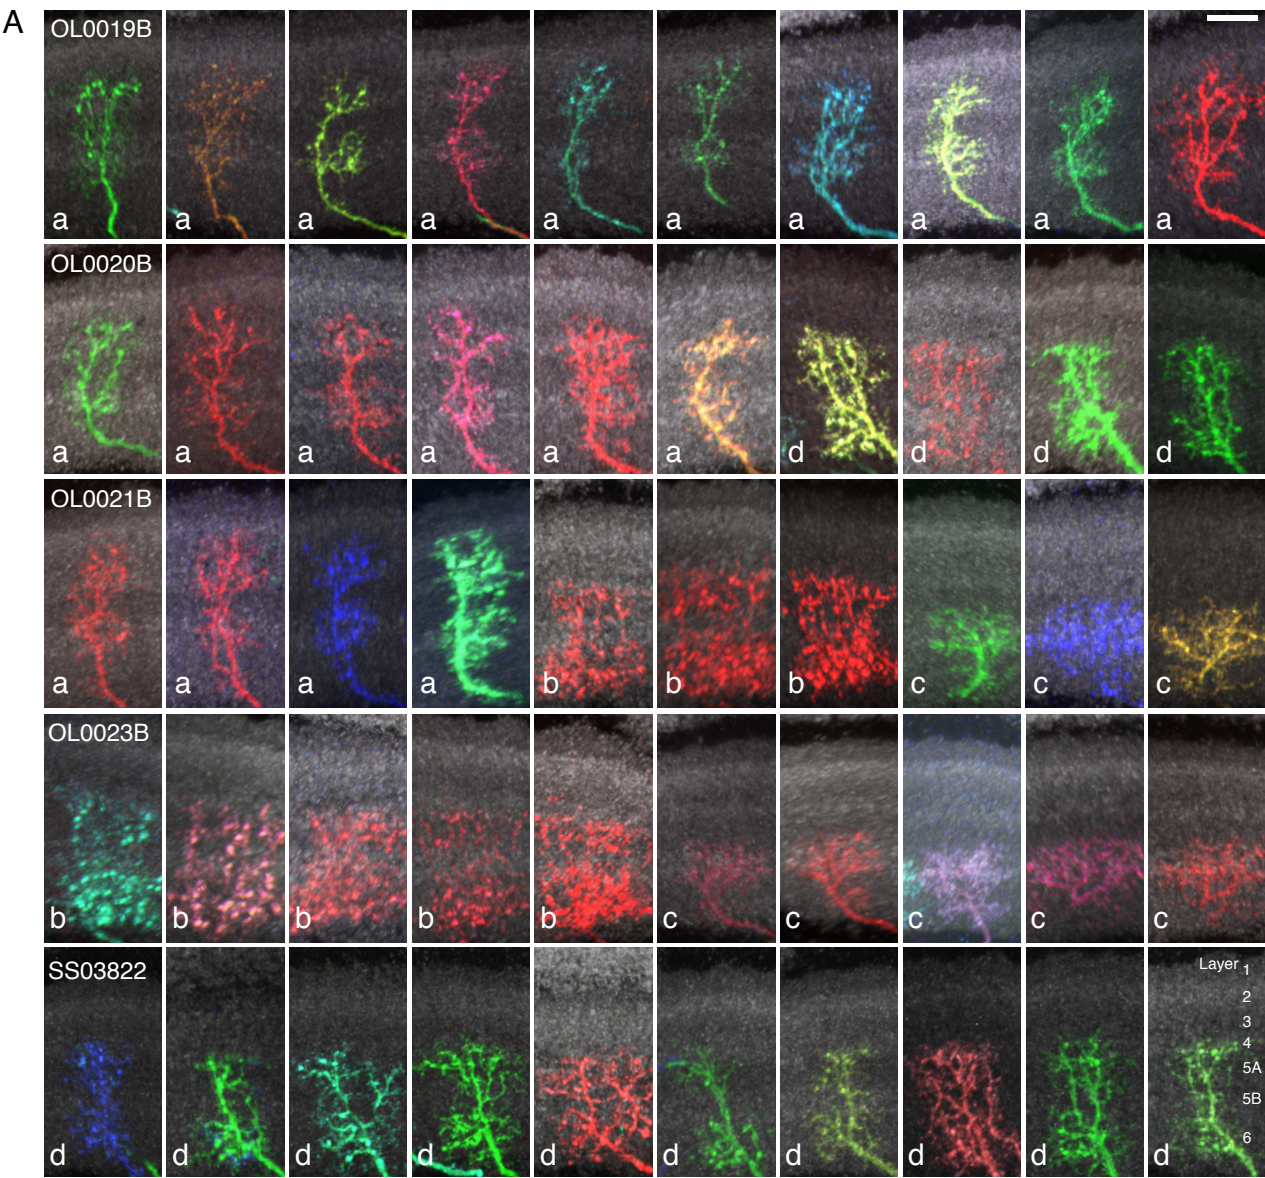

**B**

| Line    | Flies | Total cells | LC10a | LC10b | LC10c | LC10d | Summary     |
|---------|-------|-------------|-------|-------|-------|-------|-------------|
| OL0019B | 10    | 120         | 120   | 0     | 0     | 0     | a           |
| OL0020B | 5     | 81          | 44    | 0     | 0     | 37    | a,d         |
| OL0021B | 3     | 62          | 26    | 17    | 9     | 0     | a,b,c       |
| OL0022B | 5     | 49          | 30    | 0     | 0     | 19    | a,d         |
| OL0023B | 8     | 77          | 0     | 42    | 35    | 0     | b,c         |
| SS00937 | 4     | 38          | 0     | 29    | 9     | 0     | b,c         |
| SS00938 | 6     | 47          | 5     | 24    | 8     | 10    | a,b,c,d     |
| SS00940 | 6     | 68          | 1     | 21    | 46    | 0     | (a),b,c     |
| SS02663 | 14    | 128         | 0     | 59    | 69    | 0     | b,c         |
| SS02664 | 8     | 24          | 9     | 4     | 5     | 6     | a,b,c,d     |
| SS02665 | 7     | 13          | 0     | 4     | 6     | 3     | b,c,d       |
| SS02666 | 4     | 18          | 9     | 1     | 1     | 7     | a,(b),(c),d |
| SS02669 | 4     | 8           | 0     | 2     | 6     | 0     | b,c         |
| SS02681 | 6     | 14          | 0     | 9     | 5     | 0     | b,c         |
| SS03822 | 7     | 52          | 0     | 0     | 0     | 52    | d           |
