# Supplementary figures and images for: Visual projection neurons in the Drosophila lobula link feature detection to distinct behavioral programs
Source: eLife journal article supplement (doi:10.7554/elife.21022), 2016-12-28

Figure 11-figure supplement 1

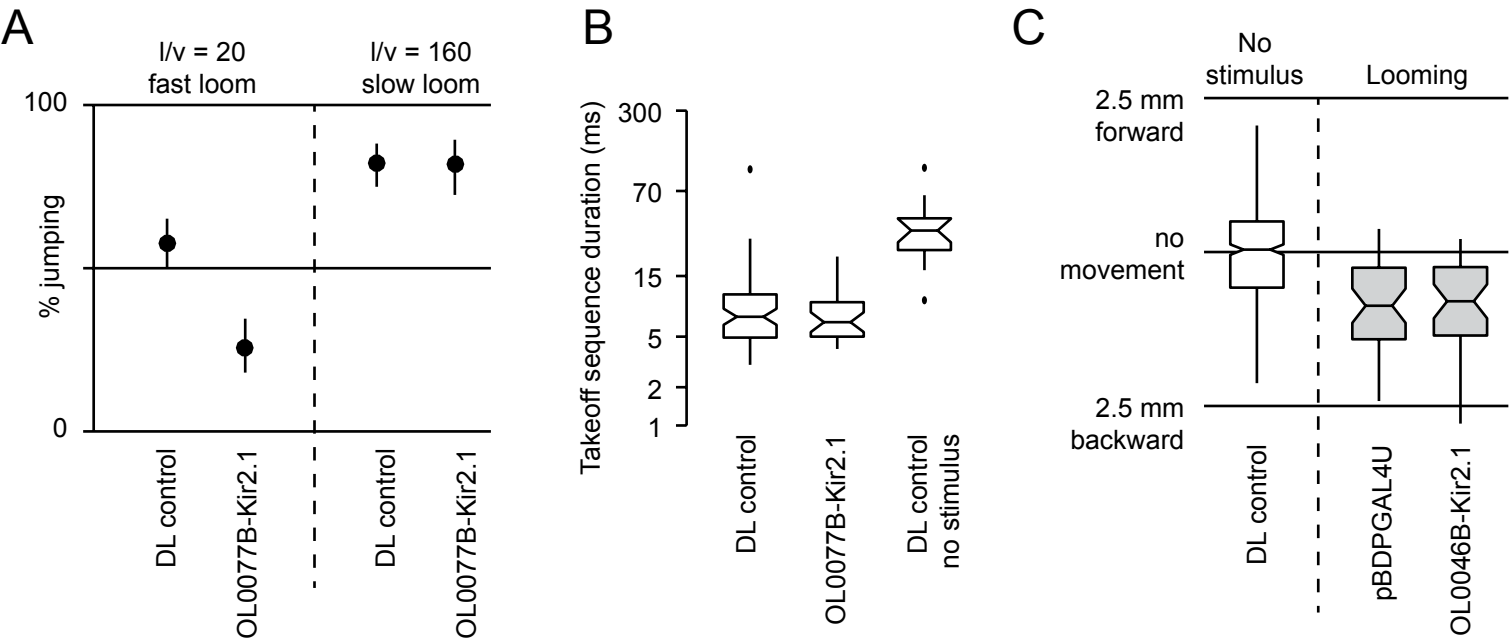

Supplement: supp [file elife-21022-supp-v1.zip › elife_poa_e21022_Figure_11_figure_supplement_1.pdf]

Figure 9 – figure supplement 2

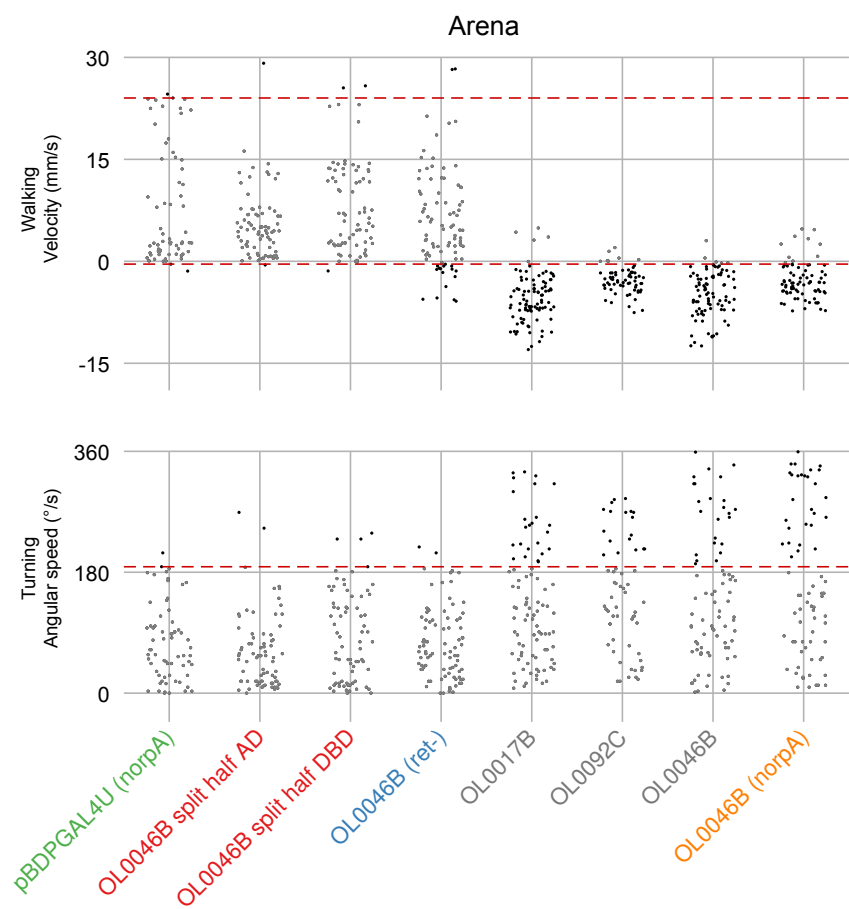

Supplement: supp [file elife-21022-supp-v1.zip › elife_poa_e21022_Figure_9_figure_supplement_2.pdf]

Figure 7- figure supplement 2

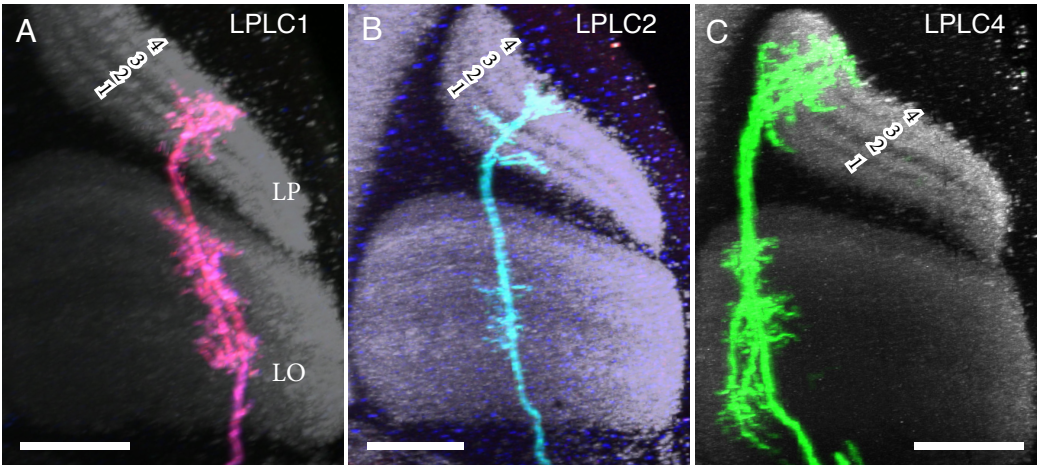

Supplement: supp [file elife-21022-supp-v1.zip › elife_poa_e21022_Figure_7_figure_supplement_2.pdf]

Figure 1 - figure supplement 1

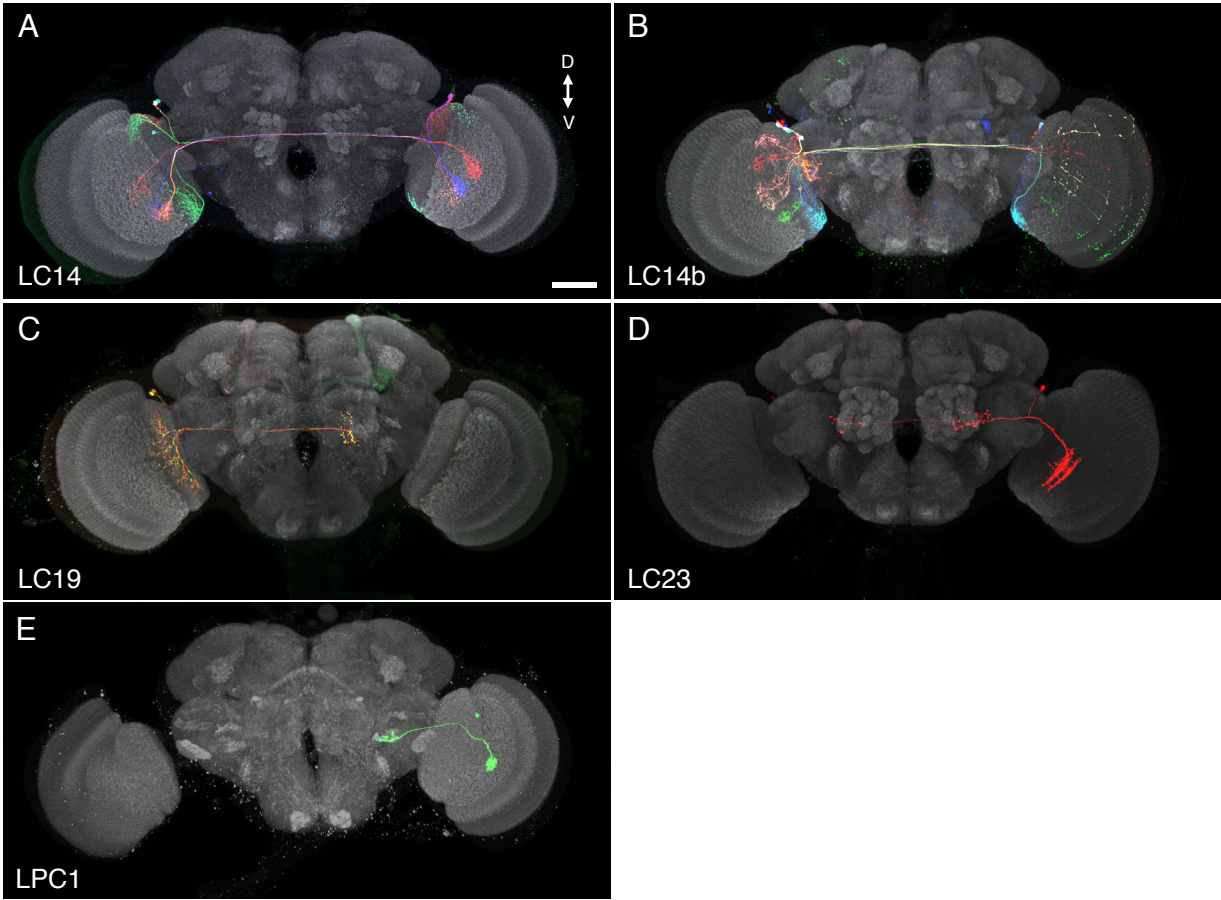

Supplement: supp [file elife-21022-supp-v1.zip › elife_poa_e21022_Figure_1_figure_supplement_1.pdf]

Figure 8 - figure supplement 1

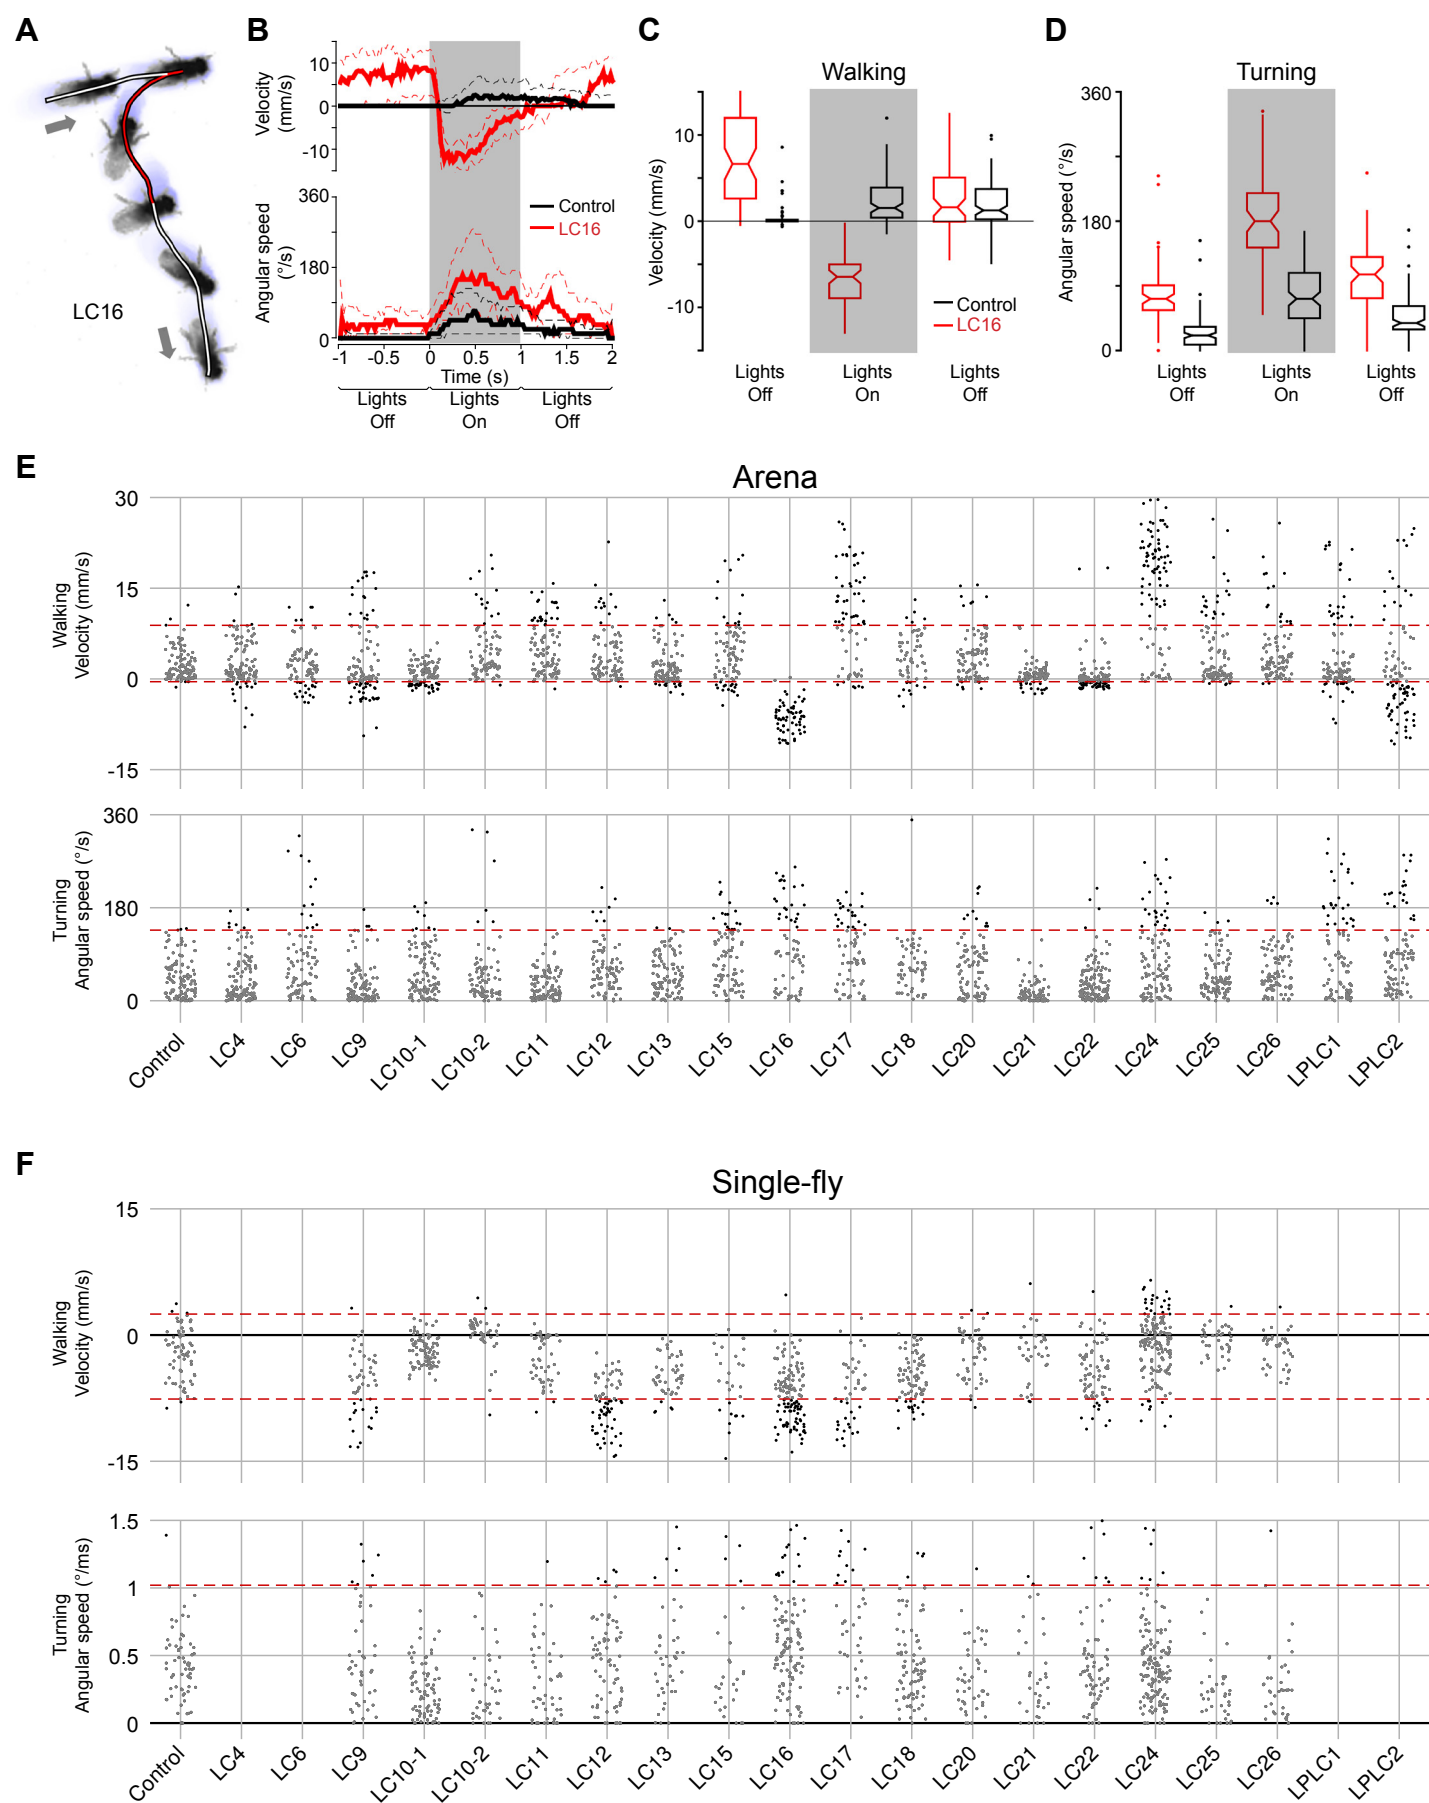

Supplement: supp [file elife-21022-supp-v1.zip › elife_poa_e21022_Figure_8_figure_supplement_1.pdf]

Figure 2 - figure supplement 1

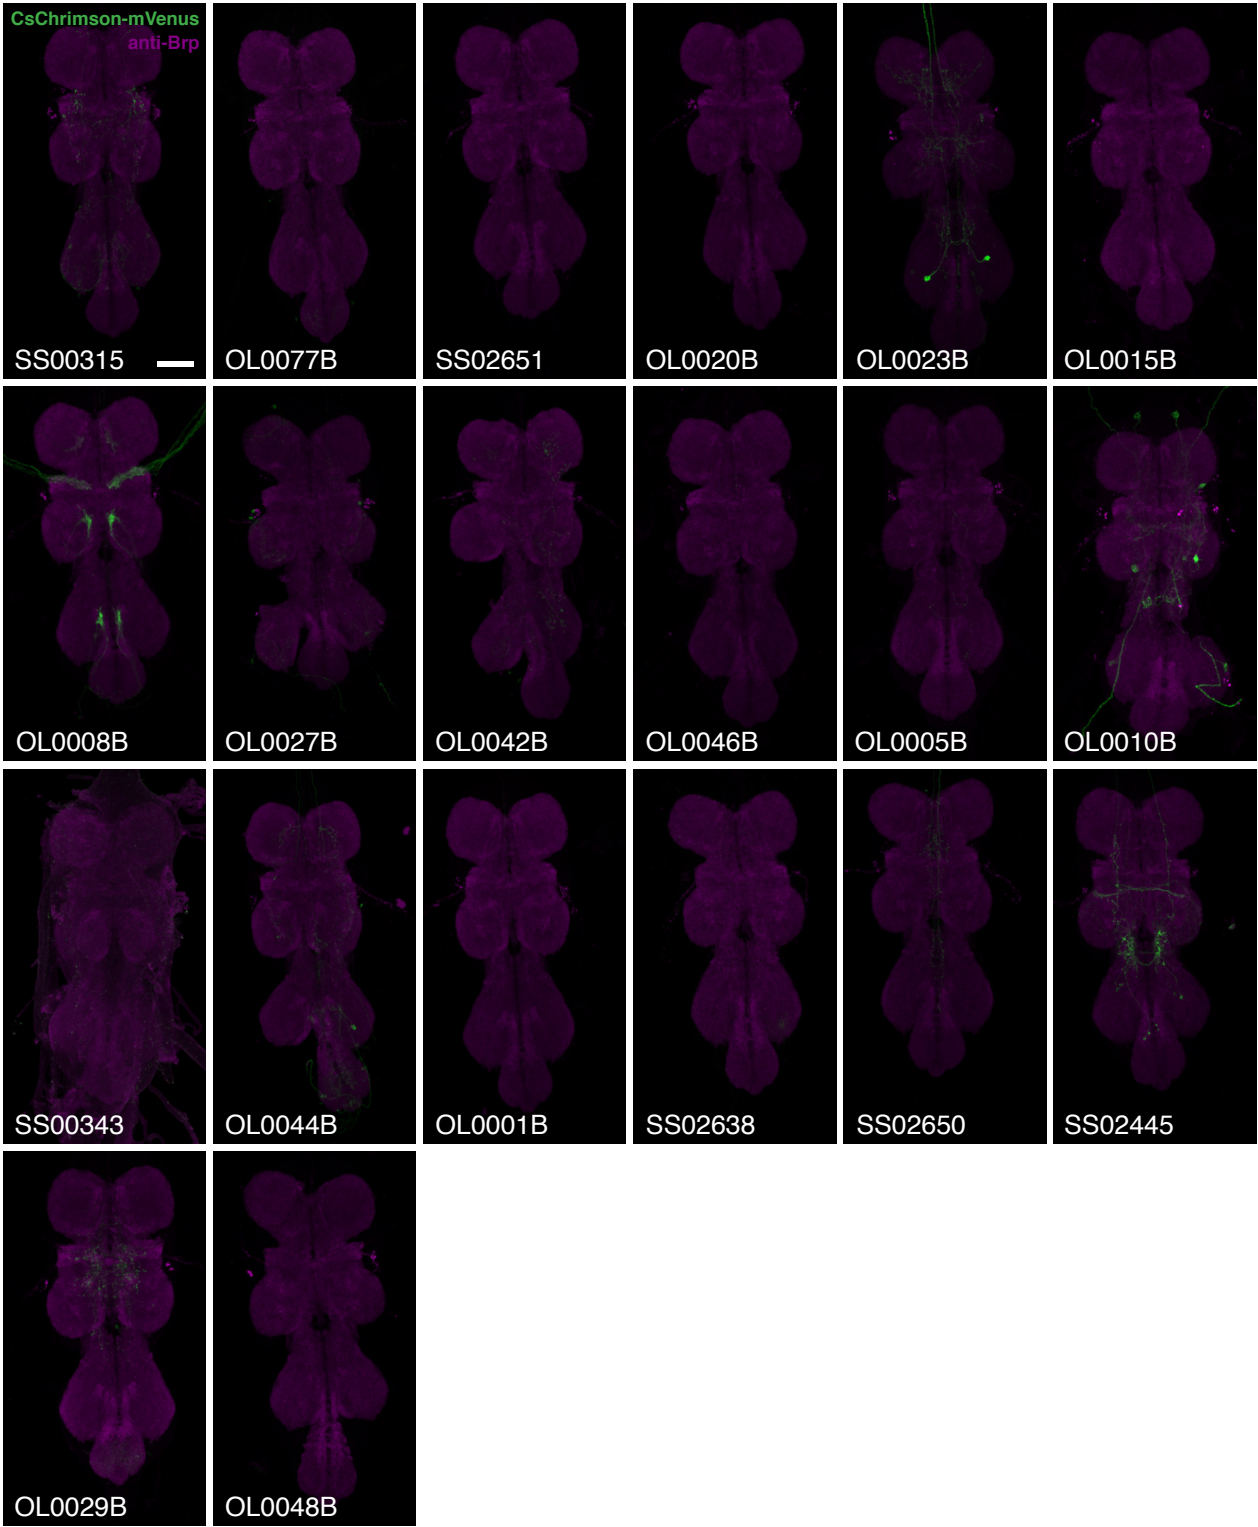

Supplement: supp [file elife-21022-supp-v1.zip › elife_poa_e21022_Figure_2_figure_supplement_1.pdf]

Figure 5 - figure supplement 2

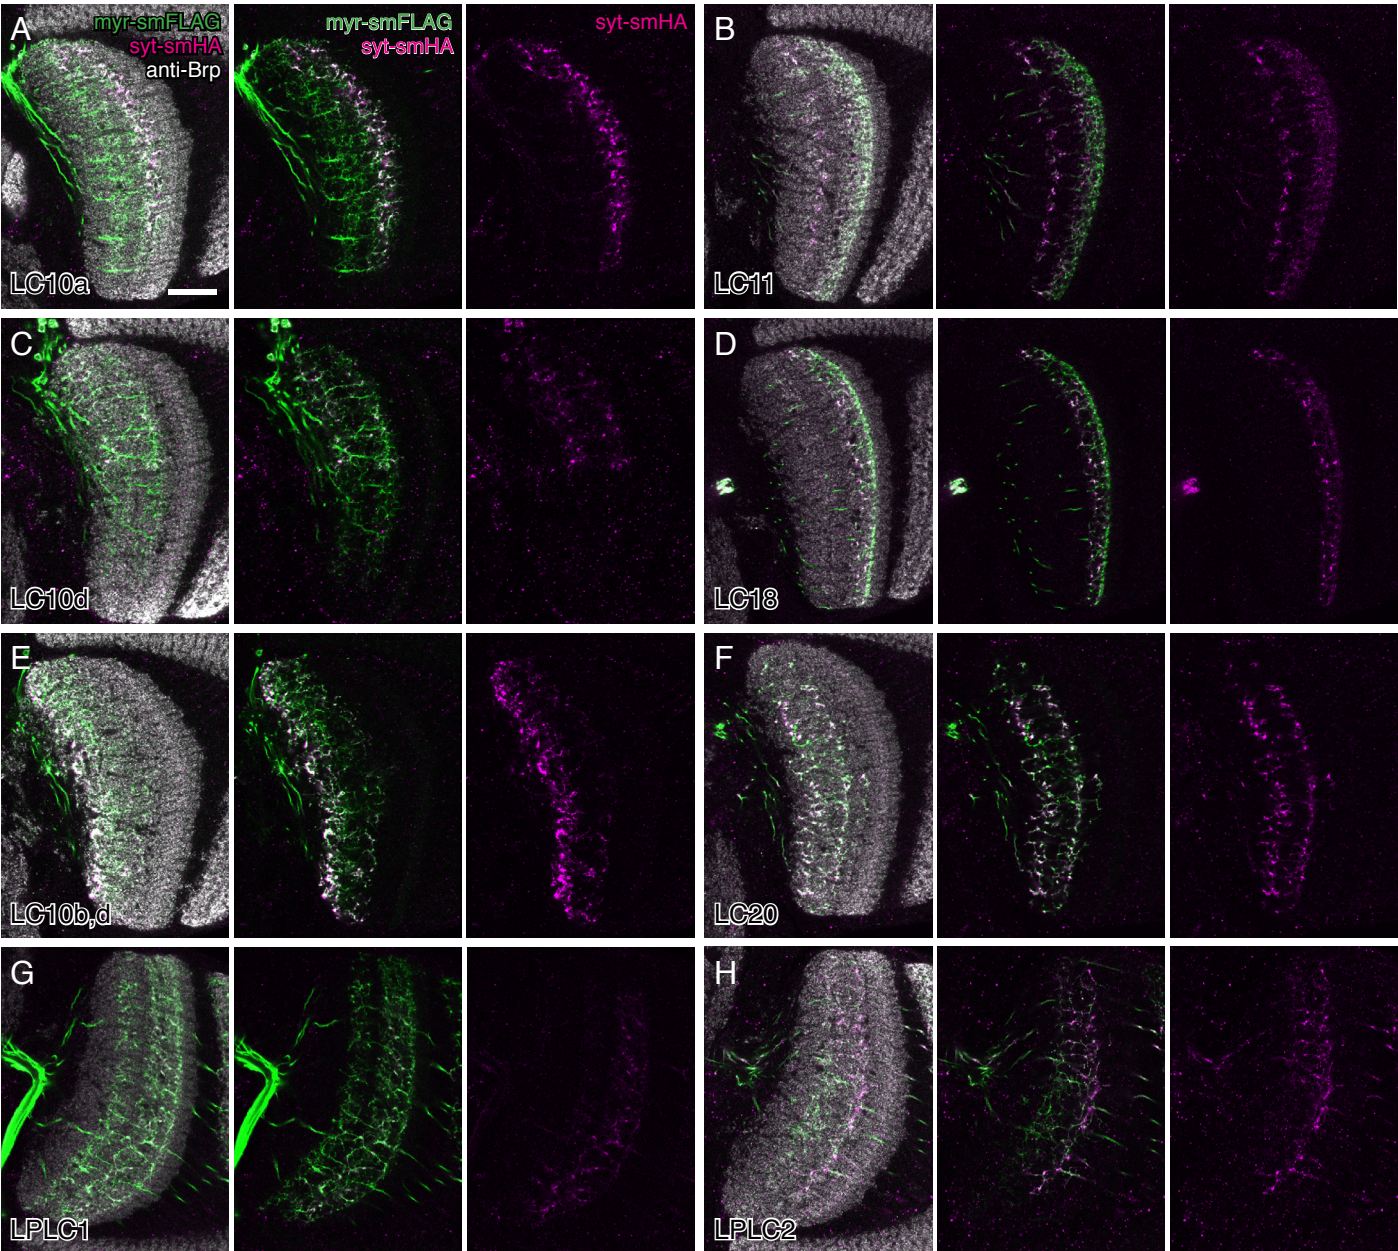

Supplement: supp [file elife-21022-supp-v1.zip › elife_poa_e21022_Figure_5_figure_supplement_2.pdf]

Figure 10 – figure supplement 1

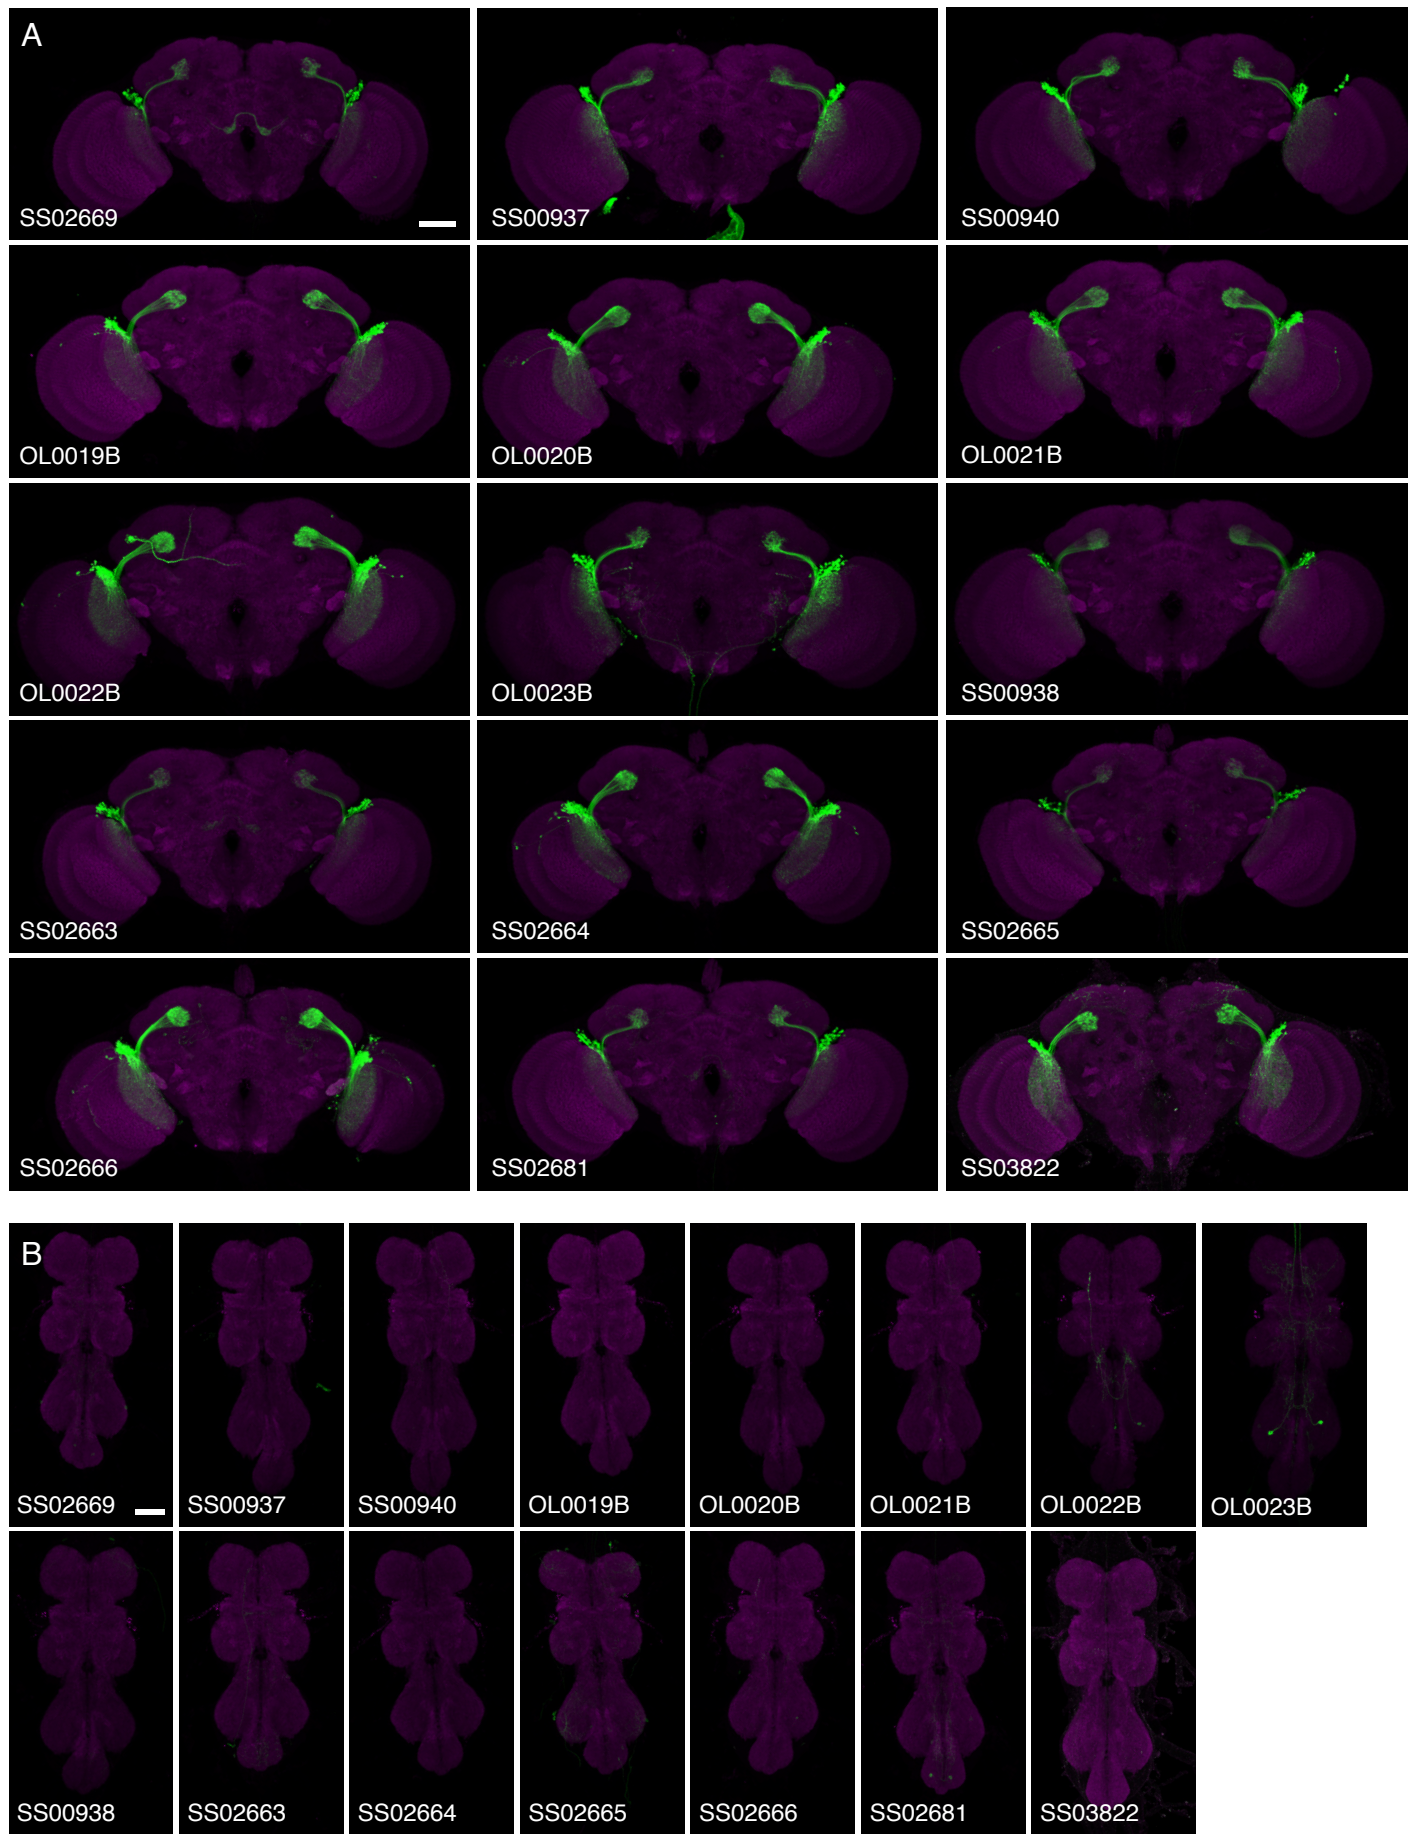

Supplement: supp [file elife-21022-supp-v1.zip › elife_poa_e21022_Figure_10_figure_supplement_1.pdf]

Figure 7 - figure supplement 1

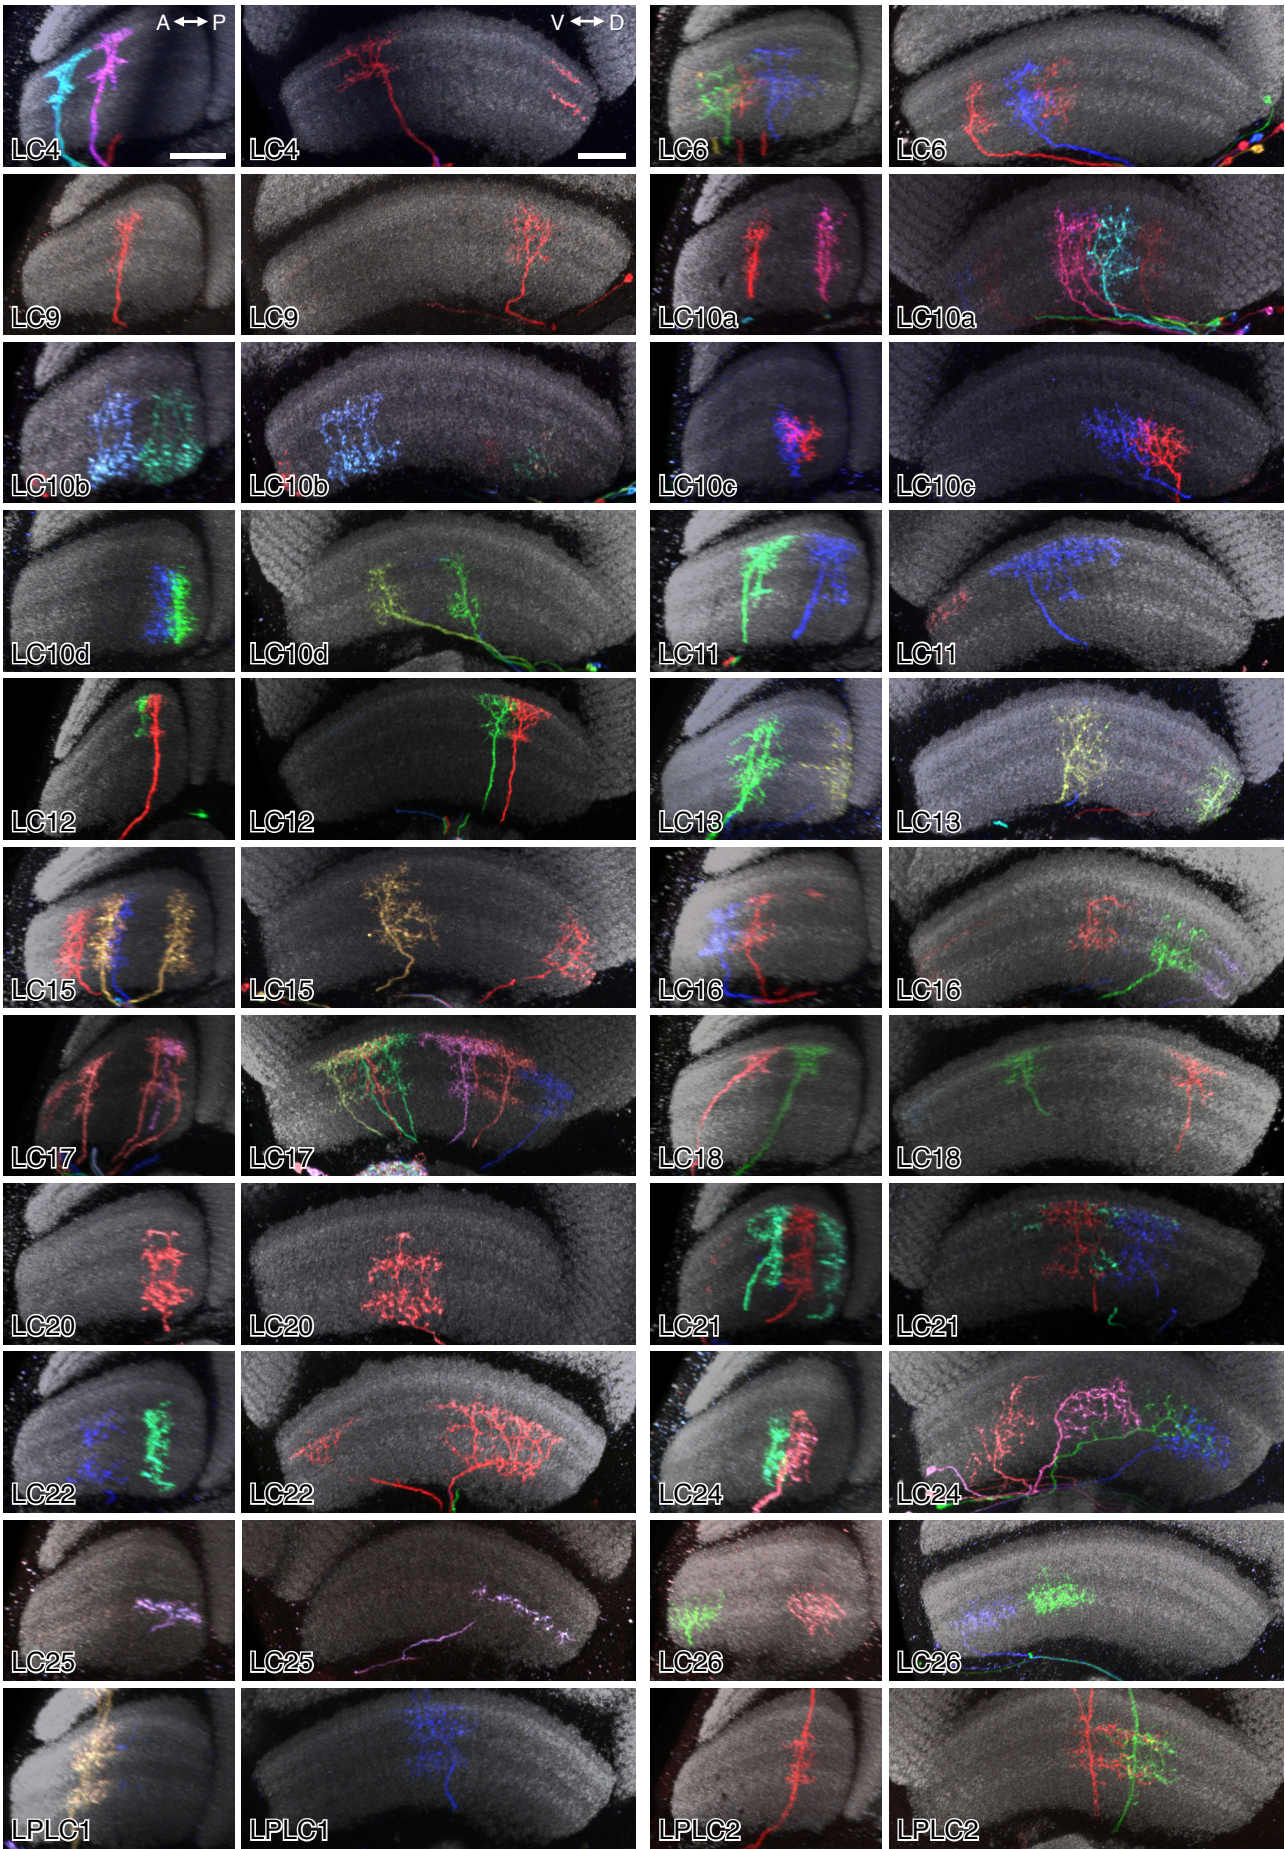

Supplement: supp [file elife-21022-supp-v1.zip › elife_poa_e21022_Figure_7_figure_supplement_1.pdf]

Figure 8 - figure supplement 2

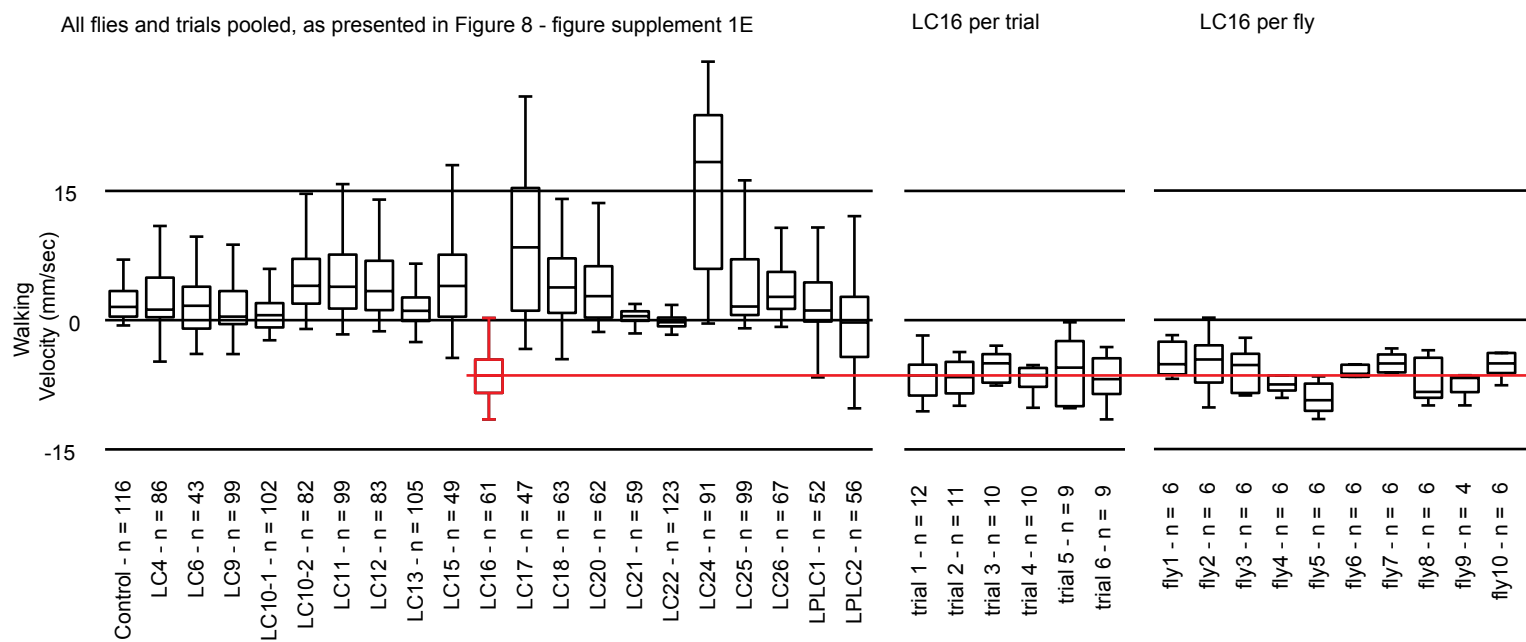

Supplement: supp [file elife-21022-supp-v1.zip › elife_poa_e21022_Figure_8_figure_supplement_2.pdf]

Figure 9 - figure supplement 1

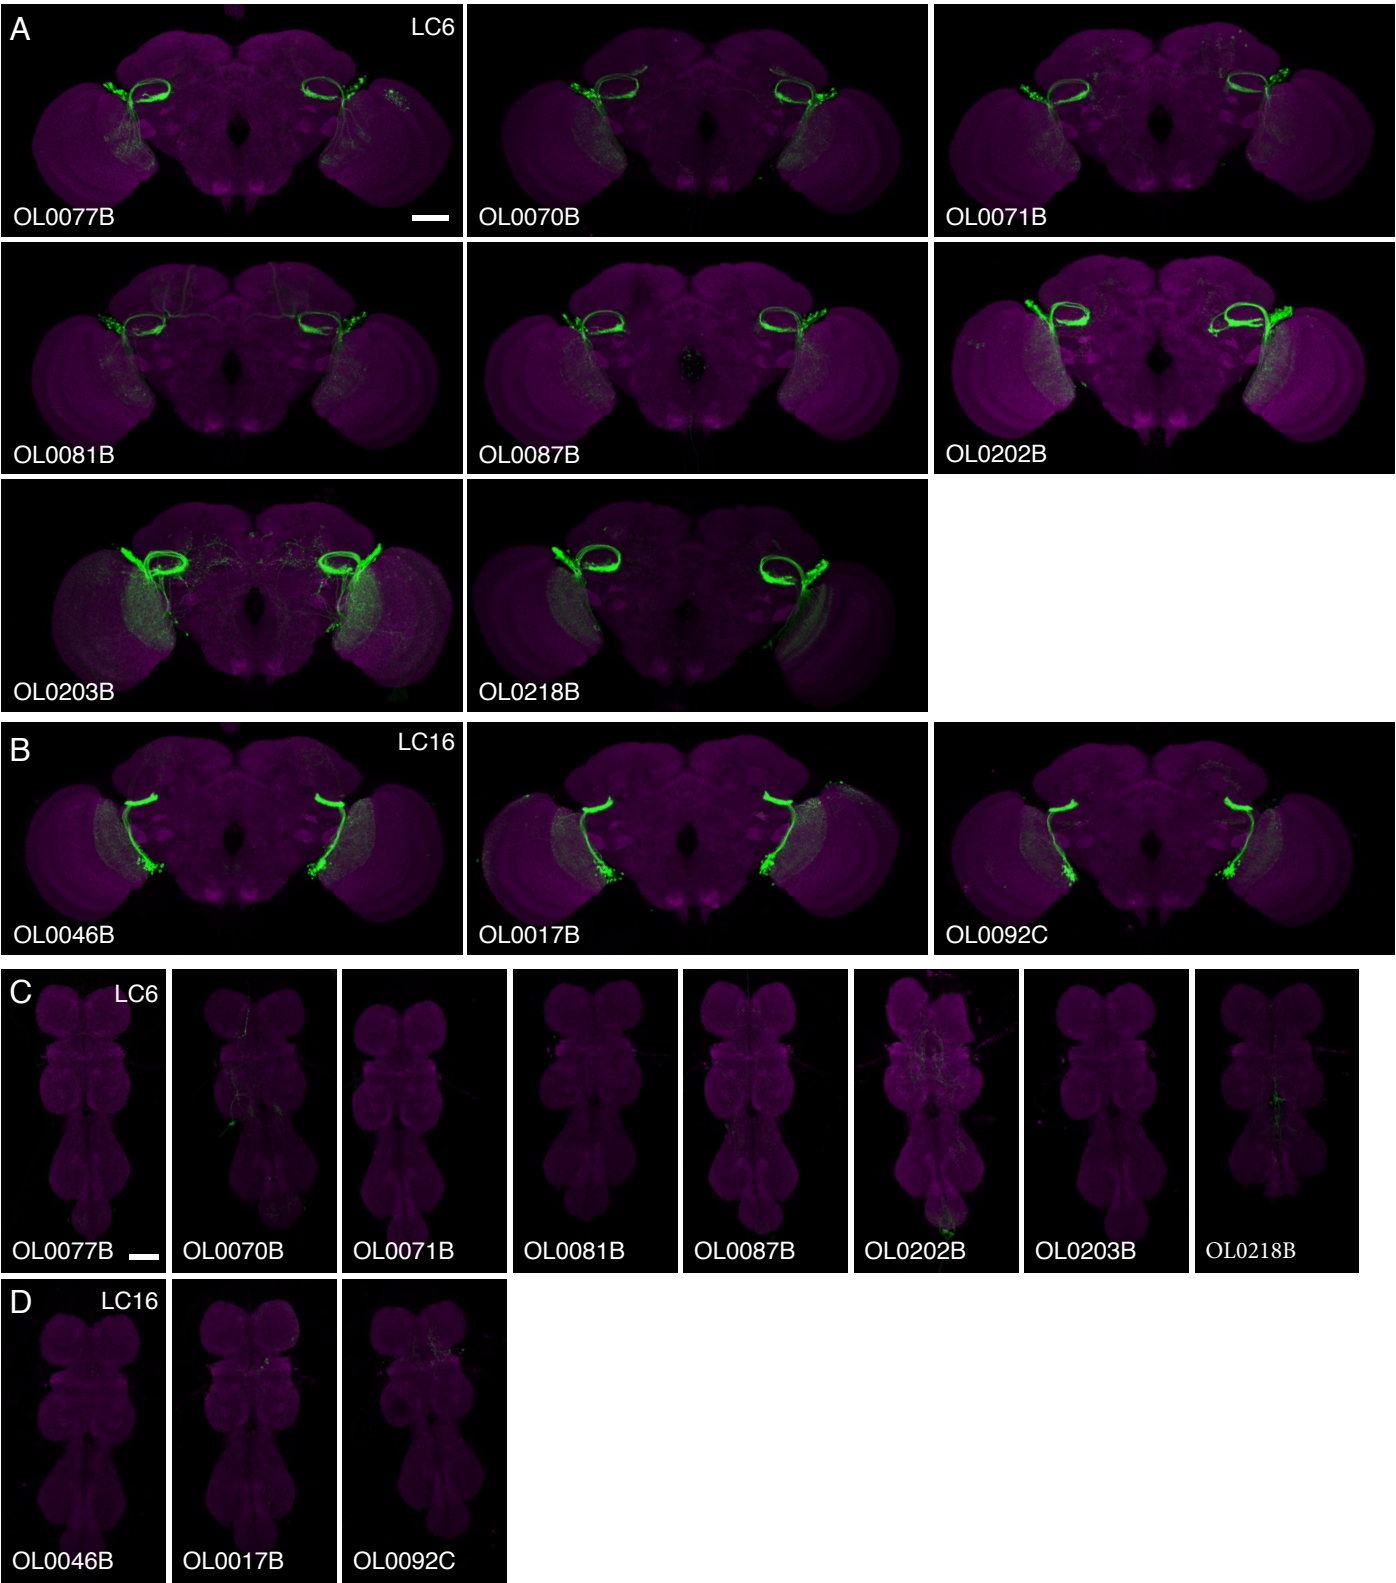

Supplement: supp [file elife-21022-supp-v1.zip › elife_poa_e21022_Figure_9_figure_supplement_1.pdf]

Figure 5 - figure supplement 1

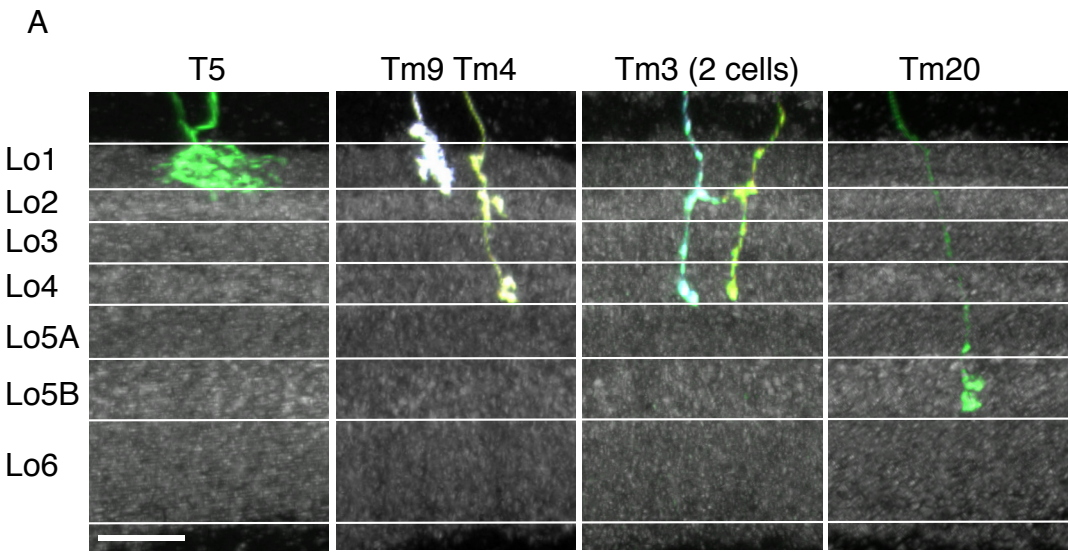

Supplement: supp [file elife-21022-supp-v1.zip › elife_poa_e21022_Figure_5_figure_supplement_1.pdf]

Figure 3 - figure supplement 1

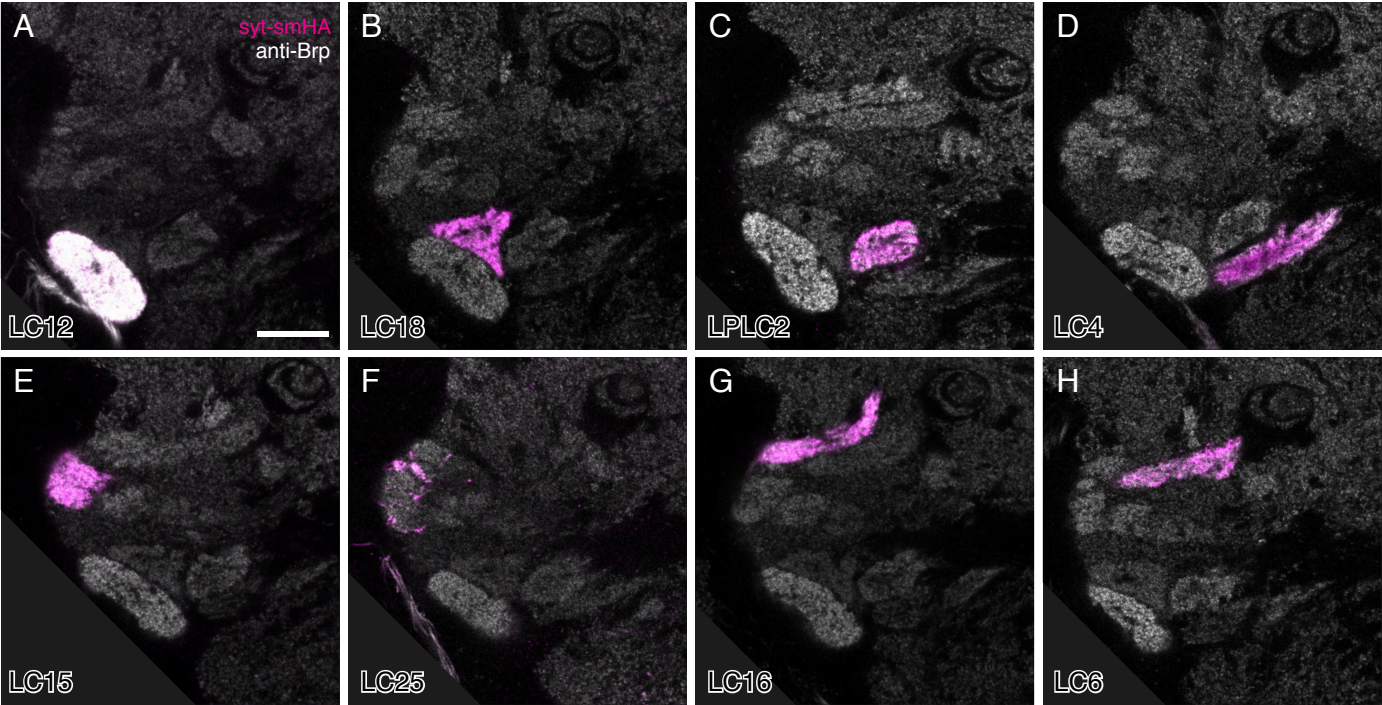

Supplement: supp [file elife-21022-supp-v1.zip › elife_poa_e21022_Figure_3_figure_supplement_1.pdf]

Figure 6 - figure supplement 1

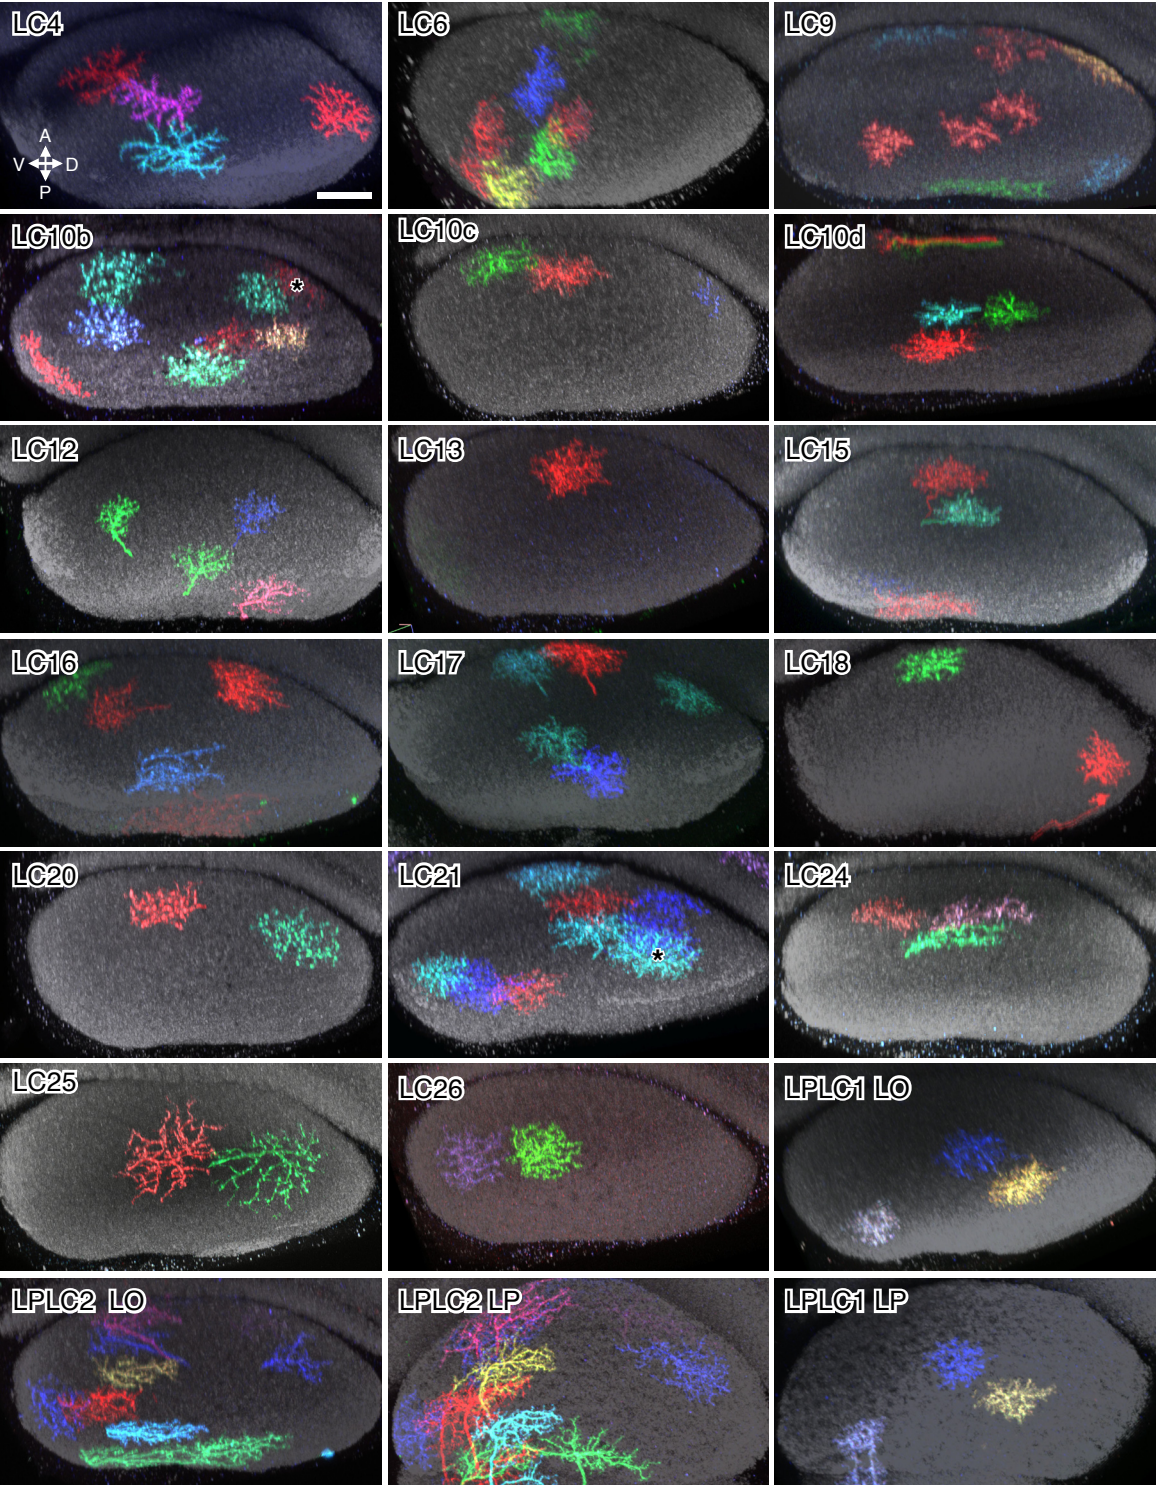

Supplement: supp [file elife-21022-supp-v1.zip › elife_poa_e21022_Figure_6_figure_supplement_1.pdf]

Figure 12 – figure supplement 1

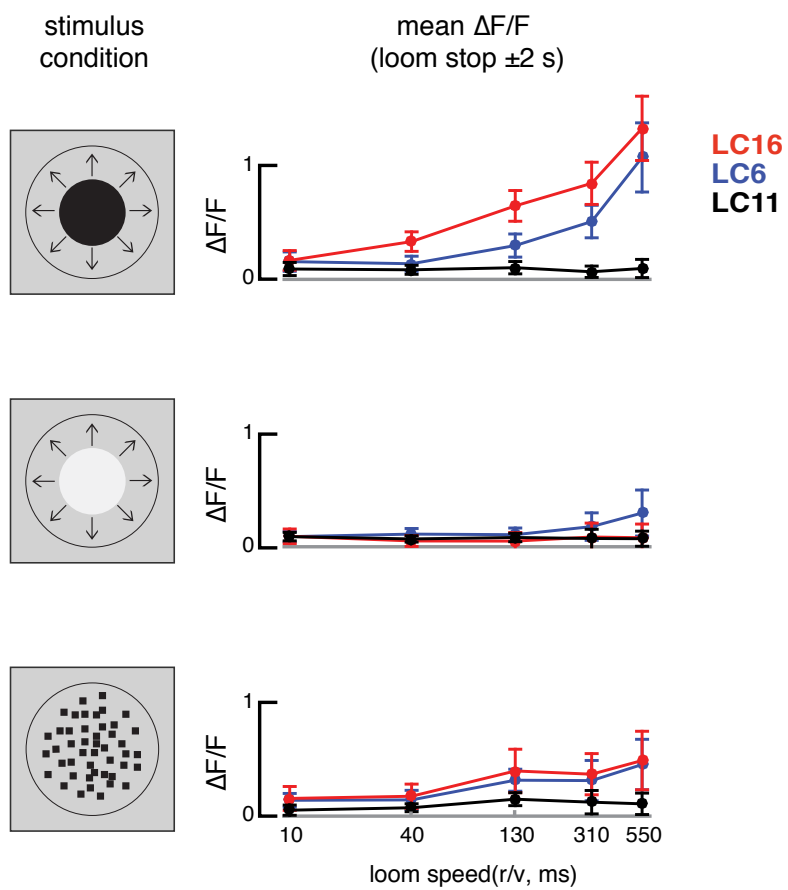

Supplement: supp [file elife-21022-supp-v1.zip › elife_poa_e21022_Figure_12_figure_supplement_1.pdf]

Figure 4 - figure supplement 1

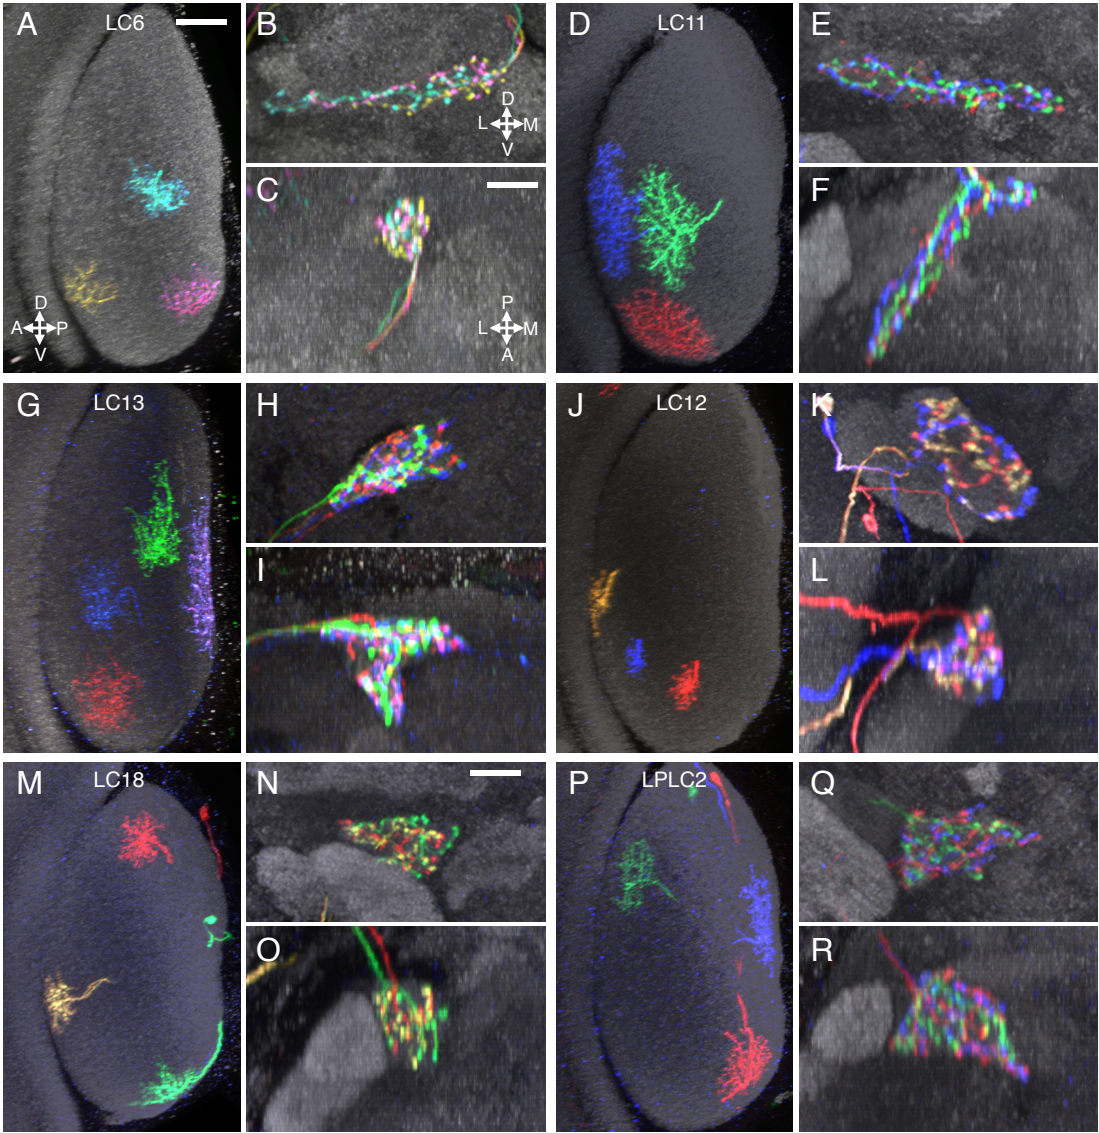

Supplement: supp [file elife-21022-supp-v1.zip › elife_poa_e21022_Figure_4_figure_supplement_1.pdf]

Figure 13 – figure supplement 1

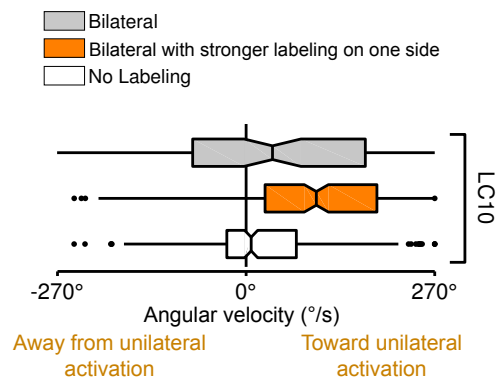

Supplement: supp [file elife-21022-supp-v1.zip › elife_poa_e21022_Figure_13_figure_supplement_1.pdf]

Figure 3 - figure supplement 2

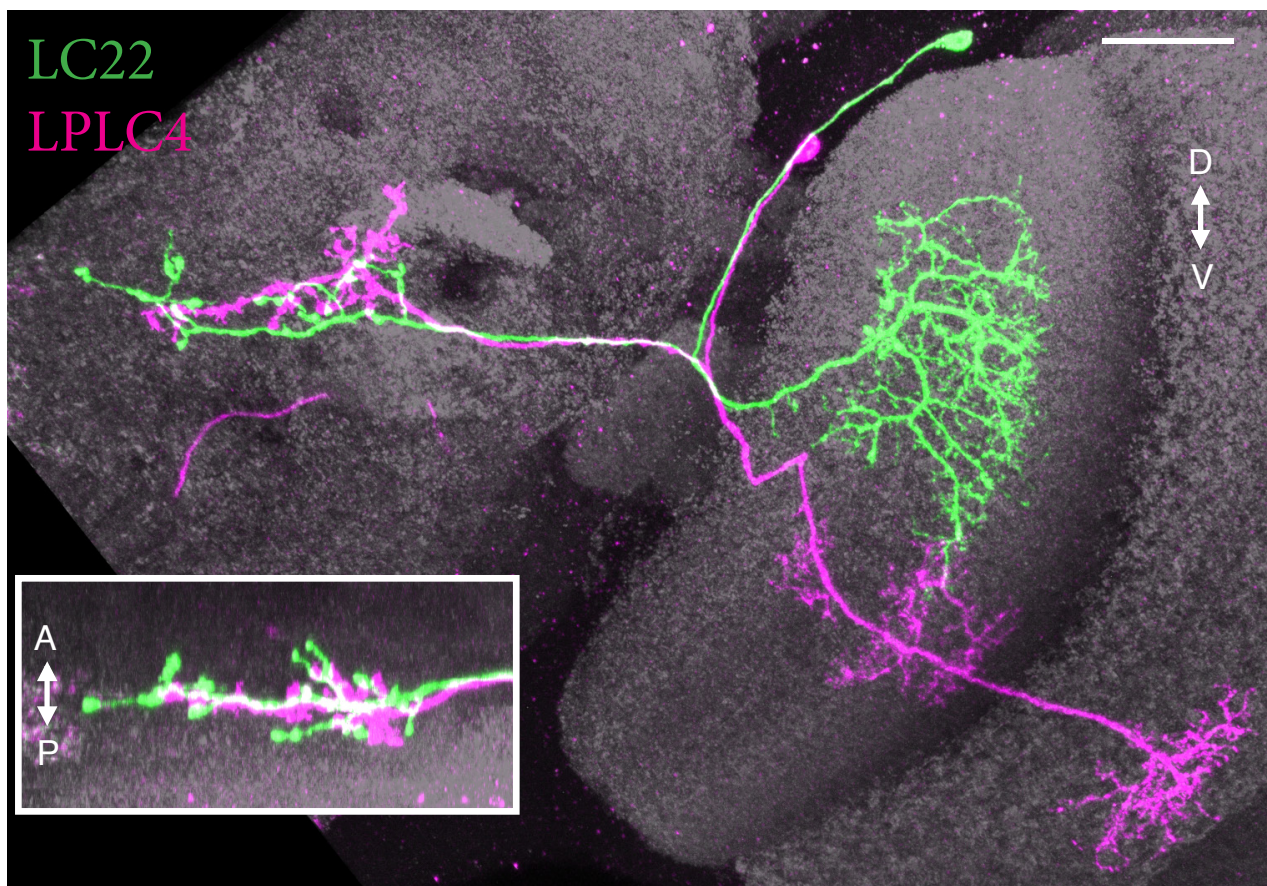

Supplement: supp [file elife-21022-supp-v1.zip › elife_poa_e21022_Figure_3_figure_supplement_2.pdf]
